# Supplementary material for: Antioxidant and Photoprotective Activity of Apigenin and Its Potassium Salt Derivative in Human Keratinocytes and Absorption in Caco-2 Cell Monolayers
Source: PubMed Central journal article supplement (PMC6539602; doi:10.3390/ijms20092148), 2019-04-30

A

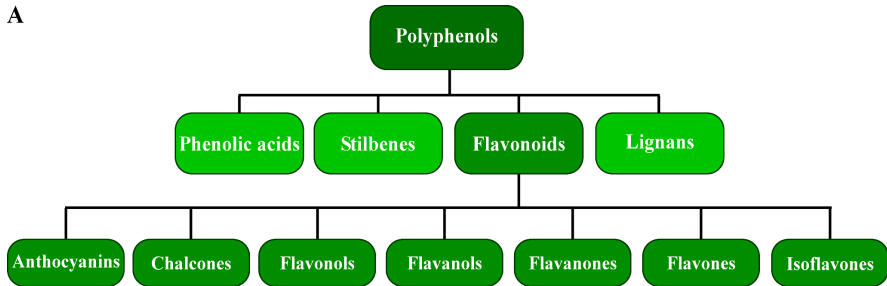

B

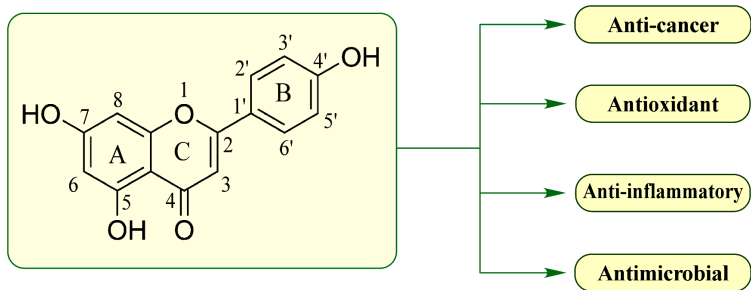

Supplement: ijms-20-02148-s001.pdf [file ijms-20-02148-s001.pdf]
